# Supplementary material
Source: PubMed Central journal article supplement (PMC2849650)
Supplement: NIHMS148137-supplement-Supplementary_Data_3.pdf [file NIHMS148137-supplement-Supplementary_Data_3.pdf]

**Supplemental Fig 1** Micrographs showing cultures of H661 cells transfected with plasmid non-effective shRNA cassette against GFP (negative control)(upper panel).or plasmid containing *CYGB* shRNA cloned within pRSPuro vector (lower panel) as described in Materials and methods. The lower panel shows *CYGB* shRNA cells forming multilayer foci(indicated by black arrows) in which cells grew on the top of each other.

**Supplemental Fig 2** RT PCR analysis showing changes in expression levels of *CYGB* and promising target genes in lung and breast cancer cells following enforced expression or knock-down of *CYGB*. RT-PCR analysis was carried out as described in Materials and Methods. For *Col1A1* and *UCP2* analysis, the number of cycles was adjusted to provide a semiquantitative estimate of relative mRNA abundance in samples with highly significant differences in expression. PCR product was separated on Agarose gel and amplicons were visualized by ethidium bromide staining. *GAPDH* was used as internal control for normalization purposes. This protocol was used to corroborate data from qPCR analysis.
