# Supplementary material
Source: PubMed Central journal article supplement (PMC2849650)

Supplemental Fig 1

H661 (-ve Control)

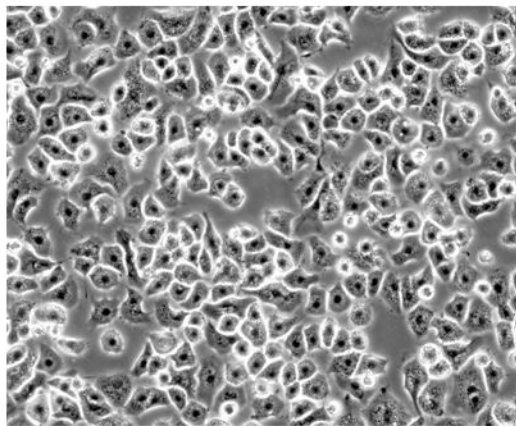

H661(CYGB shRNA)

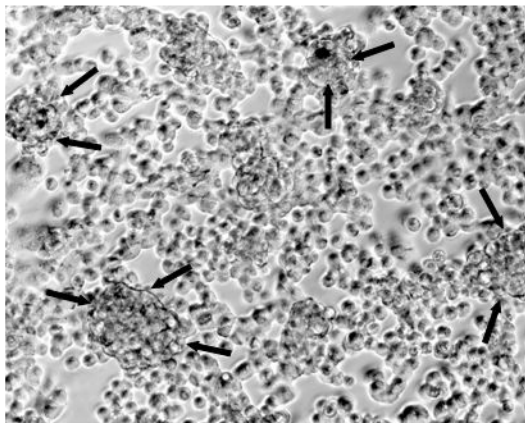

Supplement: NIHMS148137-supplement-Supplementary_Data_1.pdf [file NIHMS148137-supplement-Supplementary_Data_1.pdf]

Supplemental Fig 2

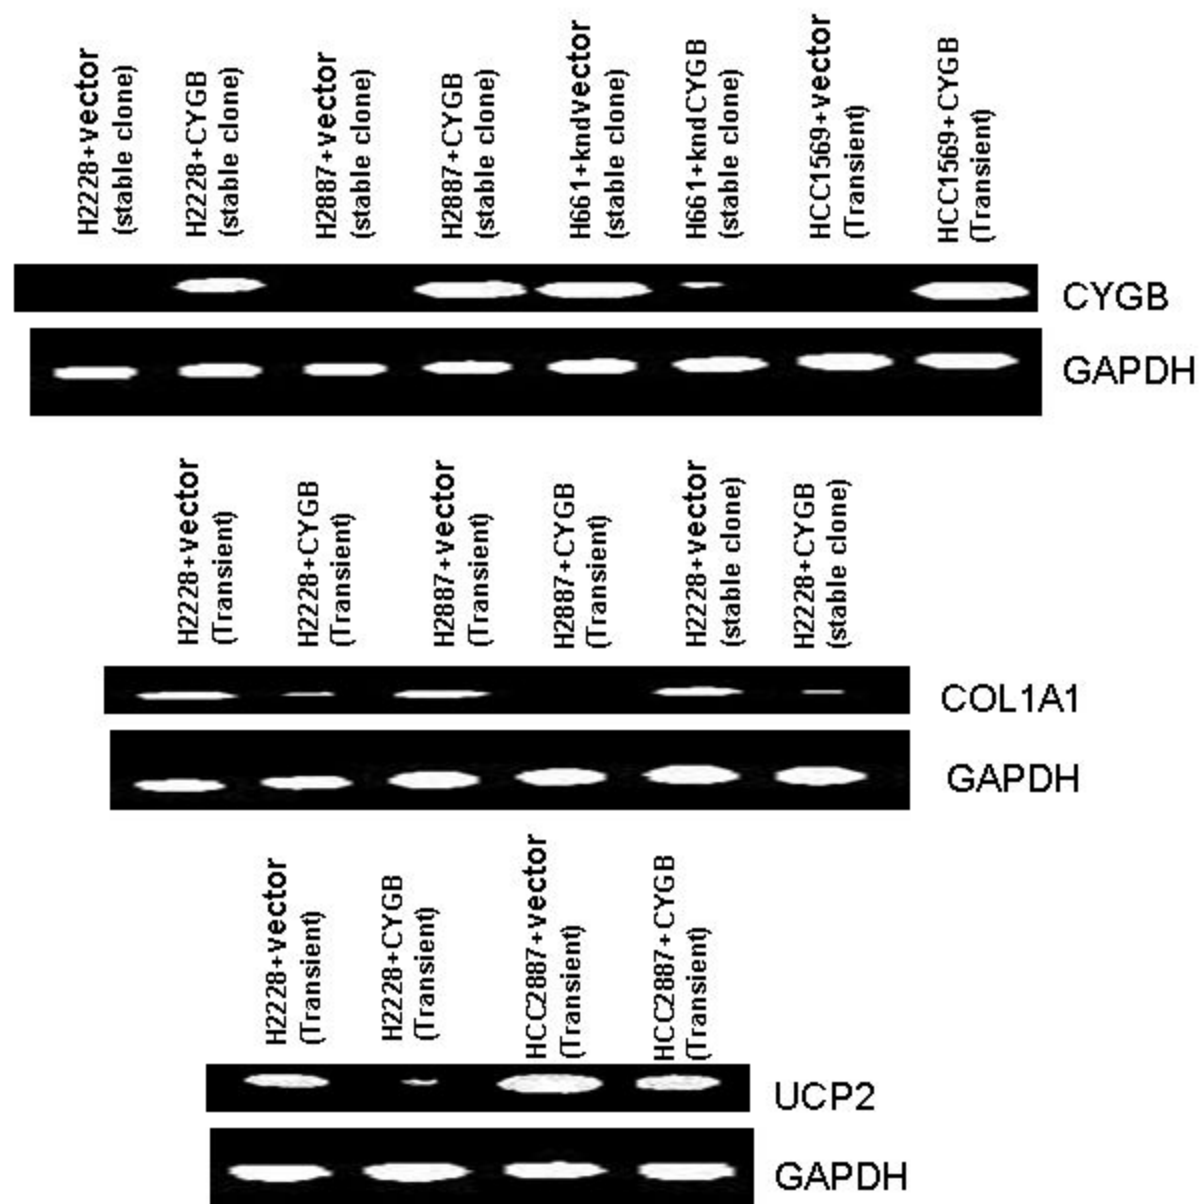

Supplement: NIHMS148137-supplement-Supplementary_Data_2.pdf [file NIHMS148137-supplement-Supplementary_Data_2.pdf]
